# Supplementary material
Source: publisher figshare collection journal article supplement (https://frontiersin.figshare.com/ndownloader/files/12542750)
Supplement: Supplementary file [file 12542750]

Query Length\_Query  
XL0C\_059976 3664

Target Length\_Target  
CNTFR 1387

dG ndG  
-78.39 -0.0566

Start\_Position\_Query End\_Position\_Query  
1294 2680

Start\_Position\_Target End\_Position\_Target  
1 1387

5'

AGTAGGAGGAATAAAAAACAAAAGAAATGATAGAAAAGAAAGTCAAAGTAGTACTTTACATCAAGAAAATAG  
AGTCTTTTATGGGATTTTATGTCTTTAAGAGTGGAAGAAGAAAGGAATTATTTAGGTGAAGATAAAGGA  
GAAGAAAATAAGTGATATCATTGGAAGAATGTGCTAGAGCCTCTCCAAACAGATAAACTGGATTAAAGGT  
TCCAGGAACAAATCATGAAACCGGCATAAAACCAAATCCAGGACTGAGAGGTATGTTGATTTAGTGTA  
TATCATCTTTCATAAGGAAGATGATGGCAGAGAAGAGTTTGCAACTCAAGGTCTAATTTTGACCCCCAAA  
GACGAATTTTCATCAAGTGGAATGAGAGTGAAGGAAATCTTGAAAGACAGTACTAGGCCATTTTAGTTCTC  
CCTGGTAGCCAAGGAGGTAAGGTGAGATGTGTGTCCAGGATTACGGGAAGCTTAACCTCAAATAGTTAAA  
TGATACAATATTCATAACCTGAGATTTTATGGGAGACAAGGCTAAAGGAACATGTGATTCTCTTAAGAAT  
AAAACCTCAGTCAATGCAAATATTTTGGAGTCTAATGAAGAGGAGTTGATGCAAGGATTACAGAGATGCCT  
CCAGGGAACTCAGATTTAGAGATGCCCGGCACAGAGGAGGCATAACTAAGAAAGTAGTCCACATATGCAA  
ATGCTTTCAAAGCACAAACCATAAGGCCAAAACTGAGGAATTTGATTACAAAACAAAGACTTATGTTCT  
ATAAAGGGCACTATGGACAAAGACAATTCGCAGATGGTAAAATGAAGAAAAAATGTGTTCTGTCTAAAC  
CAACAAAGATGTAATATCATCCTAGAACATATATGGAACCTCTGCAAAGGATCAGGGAAAAGACAGTAAC  
CCGATAGGAAAAAAGTTTCAAATAATATCAACAGGCAATTTAAGAACAGAAAACACTAACATGGATATG  
GAAATTTGATCAAAATCATTGGTAATCAAATACAAAGTAAACCAACAATGAGGTATCAGTTCACATCTAT  
CAAAAGAGCAAAAATCAGAAATCCATATAATTACTAATGTGAGGAATGTAGAAATGTAGAAACTTGCCT  
GCTGCAAGACTGATCGCATCACTTCTGGAAAGCAATCTGGTATAACTCGGATACATTAAATACATTGATA  
TGGCCAGAAATTCCTCTCCTAAGAAATATAAAACAGATTCTTACAGGTCCAGTAGGGGACTAATAGGA  
AAATGTTCTTAGCAGGTTATTTGTAGTGGAGTGGAGCTGTGGGCAACGTGGGTGTTTCATCAGTGGAGGCA  
TGGATAGATACAATATTGTGAGTGAATACCGCACATCATGGAATAGCAGGCATCAAACCTACAGCAACAGA  
GTAAATGCTAGCATCTGGTAGCGTGGAGGGAGATGAAAAACGGTGCTCAGTGAAAAAGTAAGGGACAGAA  
TGAGGCATAAAACAGTAGCTTTGGAGTACATTTAAGAATAGTGAAGTGAAGTCACTCAGTCATGCCTGAC  
TTTTTGAGCCCCATGGATTATGGCCTATCAGGCTCTTCCGTCCATGGGATTTTCCAGGCAAGAATGCTG  
GAGTGGATTGCCATTTCTTCTCCAGGGGATCTTCCACCCAGGAATCGAACTCGGGTCTCCACATTG  
CAGGCAGATGCTTTACCGTCTGAGCCACCAGGGAAGCCAGGGGTAGTTGGCTACATTTAAGAATACATG  
CCTACAAAATATTTTCCGAGGGTATATTTAAACACAATTCTAAACACTAGATACGTCTTCCTCAGTGCTT  
CAGCTGGTAAAGAACCTGTCTGCCAATGCAGGAGACACATGAGACTCCAGTTTTATCCGTGAGTGGGGAA  
GATCCCTGAAGAAGGGAATGGCTATCATTGGCTTAATCCAATAGAAAGTCAGAGGTAAGGGAATCTGTT  
GATGTGGTCCATACAGCTTAGCCTCAAAGCCCAGAGCTGGGTGAAGAGGGTAAGAAATTAACCTGAAGAG  
AGAAATAGCTATCTAGGTCGACTGGAATAAAAAATAAACACGTGTAATCAGATTTGAAATCCCCAAATG  
AGATTTTTAAGGGTGTCTGGGTAAGCCATATATATTAACCTGATTAAGTCACTAATTATGGTGCCTTAG  
GATTTTCTTGAAGGTCCAGGGCTTTGGACACTGACACTCCACTTCTACCAGAACAGCTTTGCTTTTATT  
TGGTTAATATAGCAGGAGTCTGCTTAAGATTTCACTGAGGAAACAGAATTATAGCACCACTATAGTCGG  
GCAATGTGCTATGAACTAAAAAATGAATCTCAGAATAGTGGGGAAGACAGAAAAGTGAATTACAGTACAG

TGTCAGGAAAAAACCATGAAGGGACAGTAAAGAAAGTCCAGTGAACTCCGAAGGGTCAAGGGAACAAGG  
AAGGTTTCTGGAGTCTGTAAGTAAAAGGGAGGTAAGGAAGCTCAGAGAATACTGCCGTTGCCCAAAGG  
AGGGAAGAGGAACGCAAGTTACGCAACTCTGAAACGGGCGAAGTCTCCTGGAACGAACGAGGTTACAGAT  
CCGCGGACTAGGATGGGCGCTAAAGTGATTTACGTGATAGGCAAAGACCTACTTAAGCCAGCCTCTAGC  
TTTGCTCCGCCCCCATCCCATCTCATCCTTCGTCAAAGGGGCGTGGCATTTAAACAAATGCACTCAGCTG  
GGAGGGTATCCCAACCCTGAGGCCCGCGTCACCAGCGCGGGCGGGCGGCTGCGGAGTCTCCCAGAAAAGC  
TGGTATCTCCCAGAGTGGTCTGGTTCGGGCTCCCCAGCCCCGGAGGGGCGGCTAAGAAGAAGGCGCTCAC  
TGGTTGCTATAGCGGCGATCTAAGAGGCTGGGGAAAGTTGATTGGCCGCAGGTTTCGTAGCGCGGACCACG  
CCCACCCCTTCGGGCGGCTGCAATCAGGCAAACCTCCATACTATTGTGGGTTCCATTCCAGACCACCAAA  
ATAAAAGACTCCTTCCTAAATAGGGACTGAAGACTGTAGGCCTTTCGGGTATAATTCTTGAATCCTCAA  
GTCCTACTGATGTGGTGATACCTGTTACTCAGCCAGTGGGTGTGGTGCTCCGTCGCTCAGTCGTGTCCGA  
ATTTGCAGCCTCATGGACTGTAGCCCGTCAGGCTCCTCCATTCATGGAATTTTCCAGGCAAGAATACTGG  
AGTGGGGTGCCATTTCTATTCTAGGGGATCTTCCTGATCCAGGTACAAACCCGTGTCTCTTCATCTCCT  
GCACTGGCAGGCAAATTTCTTACTACTTGTTCACCTGGGAAGCCCTAGTGGGTGCAGCGGAAGGAAATA  
ATTGGTGTACTTATGTAGGACCAATAAGGGGAATTATAAAGATGCAGGAGTCAAAGAGGGATGGAAAAGC  
ACCCTAGGCTCTCAAGAGTGGGACCAGGTACTACCTTACAGGAACAGGGAAGGGAGCTGTAAAAGAAGGC  
CACTTGATAGGGGCTCTGGAACATCAGGGAAGGAGACAGGAAAATAAACACACCCACTCTCTTCCTGCTT  
TCCTCTACTCTTACTAACTCTTATTAGTTGAACCCAACCAGAGCTTAGAAGGTAATGAAGGCAGTCAACA  
AAAGTCTATCAGGACACAGATCAG 3'

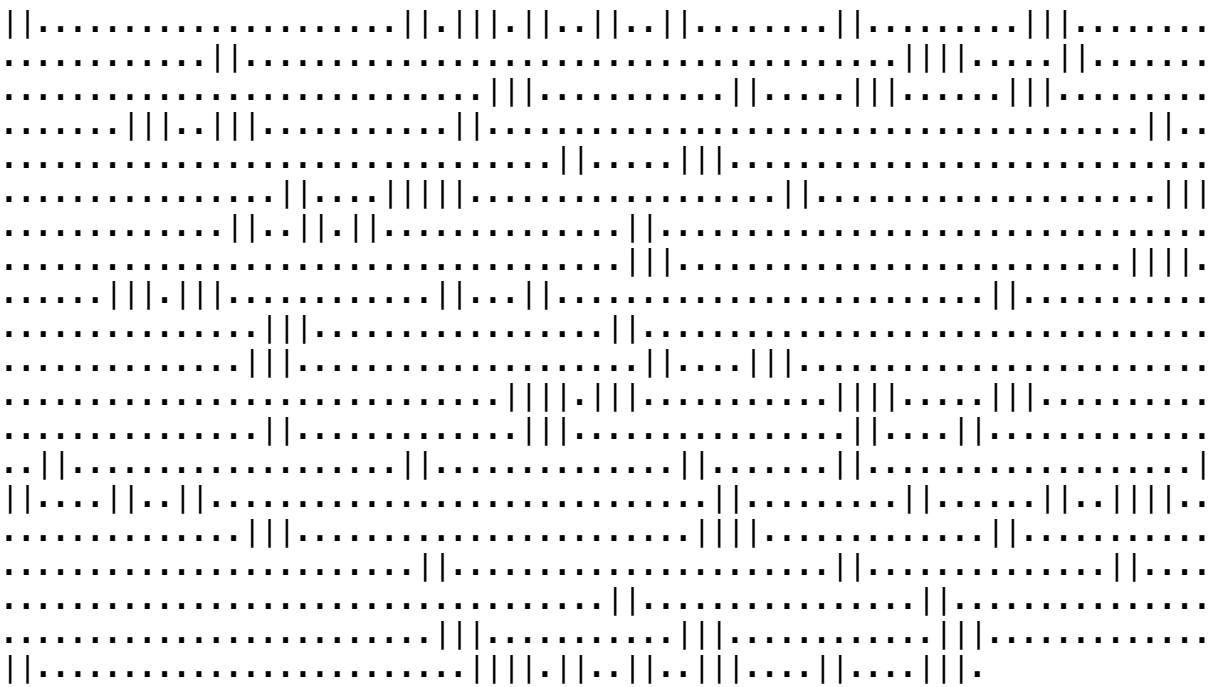

3'  
CTAGTCCTCTGCCGACCGTCACCGTCGTCGCCGTCGGTCCCGGTCTCATTGTCCCTGTGACTGCTTCCTC  
CCGCGGCTCCGACGGGGCGGCGACGGGTGAGGGGGCCCCAGTGTCTAGAAGCACCACCCGCCCCACGGT  
CACTCGACCACCACGACCAGCACCAGAGCCCCCGACCCGGAGTCACCAGTCCACAGCACCAGGAGGCA  
GGTCCCGCACCGCACCCGTCGGTGCGAGGTGAGGAGGTGAGGGTTAGAGCAACAGGAACCGGCGGTGG  
ACCTACTACATGAGGAACGGTCGCATCCGTAGACACTACCACACACGGCACGGCAGACTGTGAGGTGTA  
CGACGGTGACCAGGTCTTACTCCCAGCTATCGCGTCTTTCTTGAAGTCTCCTTTCTGAGCCCCAGCCC  
GGTCCAGCTGCCCCAGACGGTGACGTGGAGATCGGCCGCTCCAACGACCCGTGACCGGCCCGATGGTGT  
AAAAGGCCTCCAGTCCGAAGTGCTACCACTTGAGTAGTTTCCACTACCGACACCGTAACACCGGGTCCC

GCAACGACTGTGAATAGCTCTGGAACATGAACTGCCACCTCTTGTCCACGTACATCGCCTACACCGTCGC  
CAAGAACTGCCGGCCCAGGAAGAGTGTCTGGTAGTAAAACCTCGGTACGTCTGCCAGTGTAACCTCCAC  
AACCCCTACATCCACCCTCACCCGTCTACGGTCGACGTCATCTTCGGGAACCCTATTACAAACCTCGCCG  
TCGACTCGTGCCCGAGGGCGCCGCCGTTTCGGGTGTACCTCTTCGTGGACCACCGCGTCCACGGTCCTCAG  
GGCCACCTTCGTCCGCATGTCCGGCGGCACCGGGTCGAGGTCCGAGGCCTCGTGCTCGACTCTCGGCAAC  
TCGTCCAGCCCCCGGTCCAGACACGGTAAGTGGGCGGTGCAGTGGCGACGCAGGGTCGACCGTCAGGGTG  
TGCCGTCTCAGTGCAGACTCGGGTCCGCGAGCATGACGTGCACCCCTCAGAGGACGCCTGACACAGAGAC  
CCGCATCTGGTGCCGTCGTCGTCGCTCGTGCCGTGTCTCGGGGTGCCCTGTCCTCGTCGGTAGAGA  
AGTGGTTGGCGACGTGTGGCTCGTGTAGTTACAGGAGGAGAAGGAGGTCTGGTCCGAGAAGGCCTCTGAA  
GACTTTGGTTCCCCCGCCCTACTACACTGTTCCGACCCAAGCGCGGGAGCCTGTGGCCCCGAGGCGCGG  
ATCGAGAAGCTGGCGGGGGCCGTCCCTCTCTCCGTCCCTCGCGCCTCGATCGTGGCGGCGGCCTAGGGCG  
GCGGCTCGGGGCGCGACGCGGCCGACCTCGGCGACGGAGGCGACGGCGGCGGCGGGC 5'
